# Supplementary material for: Aerosol Effects on Electrification and Lightning Discharges in aMulticell Thunderstorm Simulated by the WRF-ELEC Model
Source: Copernicus journal article supplement (doi:10.5194/acp-2020-1284), 2021-01-18
Supplement: Supplementary file [file acp-2020-1284-AC1-supplement.pdf]

1 **Interactive comment on “Aerosol Effects on Electrification and Lightning**  
2 **Discharges in a Multicell Thunderstorm Simulated by the WRF-ELEC Model” by**  
3 **Mengyu Sun et al.**

4 M. Sun et al.

5

6 sunmengyu16@mails.ucas.edu.cn

7

8 **Reply to Referee 1**

9

10 This work uses an advanced microphysical scheme coupled with a charging and  
11 discharge model to study the effect of pollution on microphysical and charging  
12 processes. The subject is of interest to readers of the Journal.

13 Yet, there is much work to be done to clarify the reasons for the differences between  
14 the continental and polluted case. I am also concerned that the results are not realistic  
15 in regard to how the cloud and rain water forms as the background conditions are  
16 changed. The authors offer explanations for why they do not, but they contradict  
17 themselves within the text.

18 I highlighted areas of text that were not grammatically correct or were unclear (in  
19 attachment). I also listed my comments here that are mentioned within bubbles in the  
20 attached text. Words are used describing results that require further explanation (e.g.,  
21 what is a domain average? The authors stated that they did not use some of their results  
22 because they were not realistic). There is a lack of quantitative comparison. There are  
23 many highlighted areas and many comments.

24 I suggest the authors step back and ask themselves if the microphysical response to  
25 changes in aerosol concentration are consistent with other studies, including spectral  
26 (bin) microphysics studies, as well as observation!

27 They need to more clearly explain model simulation differences and add details where  
28 needed (see comments).

29 I do not see why Section 4.5 (Delay of First Flash) is its own section, coming well after

30 the previous results that followed the storms through their different developmental  
31 phases.

32 **Response:**

33 We appreciate these valuable comments. We have studied them carefully and have  
34 addressed them in the revised manuscript. Below are the point-by-point responses to  
35 the reviewer's comments.

36

37 120: No reference provided.

38 **Response:**

39 Thanks. We added citations as suggested: **“The special terrain condition with  
40 mountain in the northwest and ocean in the southeast (Qie et al., 2020), as well as  
41 heat island effect and elevated aerosol loading in the urban region (Zhang et al.,  
42 2013; Liu et al., 2018)...”** (Revised version, lines 122-125)

43

44 125: What is the context for stating "The maximum total lightning frequency even  
45 exceeded 1600 flashes (6 min)<sup>-1</sup> at the mature stage." How does the reader know this is  
46 a large number, considering system sensitivity varies from region to region.

47 **Response:**

48 Thanks for the reminder. We have revised the context to explain the intensity of  
49 this lightning activity and added references: **“The total lightning flashes of this case  
50 accounted for one-third of the total number of lightning flashes during the 2017  
51 warm season (Chen et al., 2020).”** (Revised version, lines 129-130)

52

53 130: Where is the description of the model physics used, the domain grid spacing, etc?  
54 How long were the simulations run? How soon after the start of the simulations did the  
55 convection of interest occur?

56 **Response:**

57 Thanks for the comments. We have added the description of the model physics  
58 used in this study, as well as the related information of the simulations. (Revised version,  
59 lines 207-220)

60

61 135: Why are processes related to graupel growth the only ones mentioned? I was  
62 expecting to read more details about diffusional growth, interactions among particles,  
63 freezing, etc.

64 **Response:**

65 Thanks. We only previously mentioned graupel growth because that the predicted  
66 graupel density is variable. And that makes it possible for the single graupel category  
67 to represent a range of particles from high-density frozen drops to low-density graupel  
68 (Mansell et al., 2010). We have added more details of the two-moment bulk  
69 microphysics scheme. (Revised version, lines 137-149)

70

71 170: higher in the Beijing area than where else?

72 **Response:**

73 Thanks for this comment. We have added the hourly average mass concentration  
74 of PM<sub>2.5</sub> on 11 August 2017, and added related reference as follows: **“The hourly-  
75 average value of the observed PM<sub>2.5</sub> concentration before the thunderstorm  
76 initiation (more than 110 μg m<sup>-3</sup>) is much higher than the 3-year mean PM<sub>2.5</sub>  
77 concentration (69.4±54.8 μg m<sup>-3</sup>) in the Beijing area (Liu et al., 2018).”** (Revised  
78 version, lines 224-227, Figure 3)

79

80 180: should be: "should effectively delay..." There is no certainty here.

81 **Response:**

82 We agree to this suggestion and have corrected in the revised manuscript.

83

84 185: There are quite large differences in the simulated radar compared to the observed  
85 radar in terms of spatial coverage. The authors should say why, and explain why these  
86 large differences do not affect their results/conclusions. Also, can the authors  
87 hypothesize why the simulated storm occurred 1.5 earlier than observed? This is quite  
88 a significant time difference.

89 **Response:**

90 These are good questions and comments. These comments contain 2 questions.  
91 We'll deal with them one by one.

92 **(A)** Regarding the differences in the simulated radar compared to the observation.

93 In order to explain these difference do not affect our results, we have made  
94 comparison of the radar reflectivity as a function of time, hourly peak rainfall rate, and  
95 the spatial distribution of precipitation between the observation and both simulations  
96 (revised version, Figure 5, 6, and 7). The comparisons show that the simulated  
97 distributions and spatio-temporal development of radar reflectivity and precipitation  
98 under polluted condition are in overall agreement with observations. In additional, we  
99 added related analysis in Part "**4.1 Radar reflectivity, precipitation and lightning  
100 flashes of multicell**" (revised version, lines 246-250; lines 255-273). With such  
101 information, the analysis of the physical processes is much appropriate for explaining  
102 the difference in the electrification and discharging in both simulated cases.

103 **(B)** Regarding why the simulated storm occurred 1.5 h earlier than the observation.

104 In our study, we use 3-hourly NCEP GFS data with resolution of  $0.5^{\circ} \times 0.5^{\circ}$  and the  
105 WRF Processing System (WPS) to configure real-time simulations. The nesting

106 technique from a domain with a resolution of 50 km×50 km to a domain with a  
107 resolution of 6 km ×6 km probably brings about instability of the simulations. Data  
108 assimilation was not applied to nudge the synoptic pattern toward the Global Forecast  
109 System (GFS) data. While assimilation of observational data can effectively improve  
110 the high-impact weather forecasting (Sun et al., 2014; Gustafsson et al., 2018). And the  
111 simulations began at 00:00 UTC on 11 August 2017, while the simulated thunderstorm  
112 formed at 09:18 UTC, which means the spin-up of the background aerosol is a little  
113 short (Lynn et al., 2020). These reasons probably result in the simulated storm  
114 occurred 1.5 h earlier than observed. As mentioned above, we have made comparisons  
115 of radar reflectivity and precipitation, and the results show that the simulated  
116 distributions and spatio-temporal development of radar reflectivity and precipitation  
117 under polluted condition are in overall agreement with observations. These  
118 comparisons mean that the analysis of the physical processes is appropriate for  
119 explaining the difference in the electrification and discharging in both simulated cases.  
120 And we would improve our simulations in the future accordingly.

121

122 205: How is the variation of flashes in the P-Case better (more) consistent with the  
123 observation. No statistics are presented to prove this point.

124 **Response:**

125 Thanks for the comment. We have used predicted flash extent density (FED), as  
126 well as grid points (grids where the simulated electric field exceeds a breakdown  
127 threshold) to assess the lightning activity between both simulations and the observation  
128 (revised version, lines 185-188; lines 201-204). In addition, we have presented related  
129 analysis in Part “**4.1 Radar reflectivity, precipitation and lightning flashes of  
130 multicell**”. (Revised version, lines 282-290)

131

132 240: In previous simulation studies, the authors note that more aerosols could be  
133 activated into cloud drops ... leading to larger cloud drop concentration. They claim that  
134 in this study no more cloud droplets could be created -- suggesting that the supply of

135 moisture was limiting. However, this could be an artifact of the scheme, rather than  
136 physical reality. Moreover, in 255, the authors claim that warm rain process was delayed  
137 -- yet why should it be, since the cloud concentration (mass/) was just mentioned to be  
138 the same.

139 **Response:**

140 Thanks for the comment. This comment contain 2 questions. We'll deal with them  
141 one by one.

142 (A) Regarding the aerosols activated to cloud droplets.

143 In light of these comment, we have analyzed the radar reflectivity and precipitation  
144 (Figure 6, 7, revised version) at the beginning stage of the thunderstorm for the  
145 observation and both simulations. Since the observed radar reflectivity during 11:00-  
146 11:24 UTC is missing, so Figure R1 shows the radar echo before and after 11:15 UTC  
147 (09:45 UTC in simulations) for comparison. In the early stage of the thunderstorm, the  
148 radar echo for the P-case is relatively similar with these of the C-case. We realized that  
149 the area we chose in the initial stage was too small. The extra cell in figure 5j (initial  
150 version) probably because that the previous selected area did not include the cell in the  
151 C-case. Therefore, we have enlarged the region (shown in Figure 4d, revised version).  
152 The microphysics along with further electrification and lightning activities of this  
153 thunderstorm have been re-analyzed. With such improvements, we believe the analysis  
154 of the physical processes is much appropriate for explaining the difference in the  
155 electrification and discharging in both simulated cases. The results show that more  
156 aerosols could be activated into cloud droplets under polluted condition and more water  
157 vapor condenses onto these droplets. The related description has been modified in Part  
158 **"4.2 Microphysical properties of multicell"**. (Revised version, lines 323-360)

159

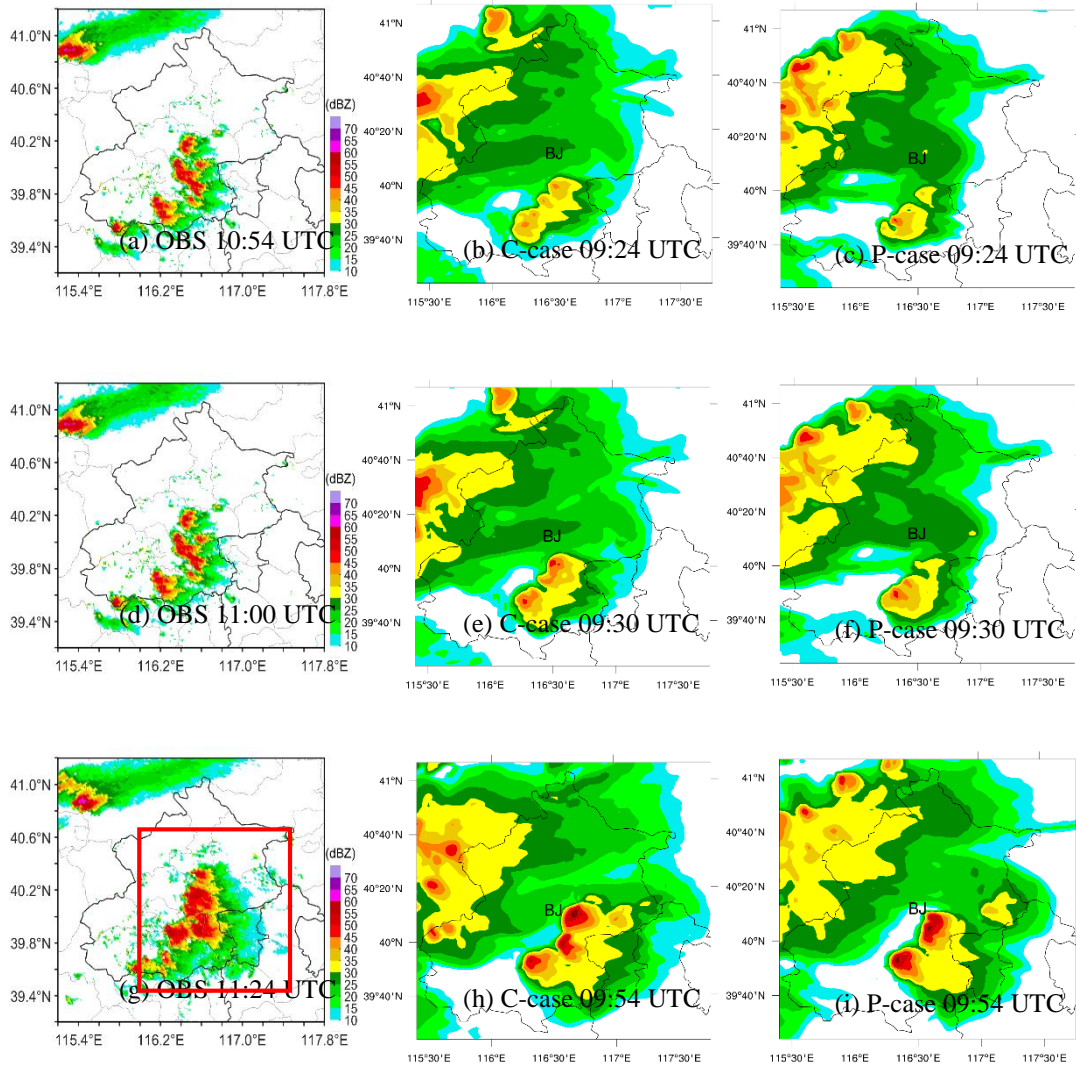

160  
161

162  
163

164

165 **Figure R1** Radar reflectivity (unit: dBZ) between observation and simulation for the C- and P-cases,  
 166 the simulation was earlier than observation about 1.5 h. (a), (d), (g) Observation at 10:54 UTC,  
 167 11:00 UTC and 11:24 UTC. (b), (e), (h) Simulation for the C-case at 09:24 UTC, 09:30 UTC and  
 168 09:54 UTC. (c), (f), (i) Simulation for the P-case at 09:24 UTC, 09:30 UTC and 09:54 UTC,  
 169 respectively. The red rectangle in Fig. R2g denotes the region where the simulated results are  
 170 analyzed in this study.

171

172 **(B)** Regarding the warm rain process.

173 We agree to the reviewer's comment. We have made the comparison of  
 174 precipitation between the observation and both simulations (revised version, Figure 6,  
 175 7; lines 255-273), and found the warm rain processes was not delayed. We have deleted  
 176 this sentence in the revised manuscript.

177

178 265: Moreover, latent heating profiles are similar in areas of cloud mass, again  
179 suggesting that warm processes were not delayed.

180 **Response:**

181 Thanks for the comment. Yes, the warm rain processes in this study were not  
182 delayed. And the temporal variation of the vertical profiles of peak latent heating has  
183 been added in Figure 12 (revised version) to make comparison of latent heat between  
184 both simulations during the whole duration of the thunderstorm. The latent heat shown  
185 in Figure 12 results from both condensation and freezing. In addition, related analysis  
186 has been added in Part “**4.2 Microphysical properties of multicell**”. (Revised version,  
187 lines 327-329, 353-360)

188

189 260: Please add more up to date references.

190 **Response:**

191 Thanks for the suggestions and we have added related references as follows:  
192 “**Observations and simulations also found that the content of ice crystals could be**  
193 **greater under polluted condition, resulting from more condensation latent heat**  
194 **and strengthened updrafts (Khain et al., 2008; Koren et al., 2010; Wang et al., 2011;**  
195 **Zhao et al., 2015; Tan et al., 2017; Lynn et al., 2020).**” (Revised version, lines 341-  
196 344)

197

198 270: They state that the mass mixing ratio of graupel was relatively less in the P-case.  
199 This is contrary to the mentioned studies (more references could be added). They  
200 suggest that reduced raindrop freezing explains this, but previously mentioned that  
201 latent heating was the same. How can this be since latent heat is released from droplet  
202 condensation? Were the drop sizes smaller? Was there more snow?

203 **Response:**



204 Thanks for these questions. We will deal with them one by one.

205 **(A)** Regarding the latent heat.

206 For clarity, we have used the temporal variation of the vertical profiles of peak  
207 latent heating (Figure 12, revised version) to make comparison of latent heat between  
208 both simulations during the whole duration of the thunderstorm. The latent heat shown  
209 in Figure 12 results from both condensation and freezing. Related analysis have been  
210 modified in several parts, for example:

211 Lines 324-329: **“Under polluted condition, more aerosols could be activated**  
212 **into cloud droplets and more water vapor condenses onto these droplets, leading**  
213 **to large cloud water content and small droplet size (Lynn et al., 2007; Wang et al.,**  
214 **2011; Zhao et al., 2015; Jiang et al., 2017). Thereby, relatively more latent heat of**  
215 **condensation released in the P-case where large cloud water content exists, which**  
216 **can be seen in the vertical distribution of peak latent heat (Figure 12).”**

217 Lines 331-334: **“Under polluted condition, cloud droplets with smaller mean-**  
218 **mass radius are too small to be converted into raindrops. As a consequence, the**  
219 **rainwater mass mixing ratio is less in the polluted case compared to the continental**  
220 **one (Figure 10d).”**

221 Lines 371-373: **“In this study, the graupel content was higher in the C-case,**  
222 **probably owing to higher rainwater content and corresponding raindrop freezing.”**

223 **(B)** Regarding the drop size and snow contents.

224 We have added domain-averaged properties of different hydrometeors in Table 3  
225 (revised version). The information of snow is shown in Table R1 and Figure R2. The  
226 size of raindrops in the P-case is larger, which is also be found in Wang et al. (2011),  
227 probably resulting from the melting of ice-phase particles. By collecting droplets and  
228 ice-phase particles, the aggregation of snow in the simulation is partially similar to the

229 accretion of graupel (Zrníc et al., 1993; Ziegler et al., 1985). The snow content is also  
 230 less in the P-case (Figure R2a, R2b), while there is no significant difference of domain-  
 231 averaged mean-mass radius of snow between the P- (421.1  $\mu\text{m}$ ) and C-case (375.9  $\mu\text{m}$ ,  
 232 Table R1). The single graupel category, which has variable density in the microphysical  
 233 scheme, represents a spectrum of particles ranging from high-density frozen drops (or  
 234 small hail) to low-density graupel (Mansell et al., 2010), therefore, could better  
 235 represent mixed-phase processes. Since there is little difference of number  
 236 concentration and mean-mass radius compared to the graupel and ice crystal, we would  
 237 add these to the supplement if necessary.

238

239

240

**Table R1. Domain-averaged Properties of Hydrometeors.**

|                | Number Concentration<br>( $10^3 \text{ kg}^{-1}$ ) |        | Mean-mass Radius<br>( $\mu\text{m}$ ) |        |
|----------------|----------------------------------------------------|--------|---------------------------------------|--------|
|                | C-case                                             | P-case | C-case                                | P-case |
| Cloud droplets | 3930                                               | 7910   | 6.5                                   | 6.1    |
| Rain drops     | 0.069                                              | 0.031  | 154.1                                 | 179.9  |
| Ice Crystals   | 2280                                               | 3850   | 3235.8                                | 2994.9 |
| Graupel        | 0.028                                              | 0.012  | 322.4                                 | 479.5  |
| Snow           | 4630                                               | 3880   | 375.9                                 | 421.2  |

241

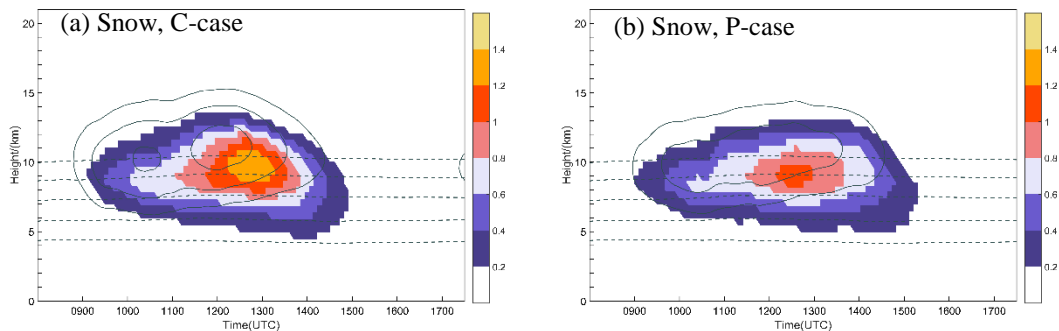

242

243 **Figure R2** (a)-(b) Temporal variation of the vertical profiles of domain-averaged mass mixing ratio  
 244 ( $\text{g kg}^{-1}$ , shaded) and number concentration ( $\text{kg}^{-1}$ , solid lines) of (a) snow in the C-case, (b) snow in  
 245 the P-case. Contour levels in (a)-(b) for snow are  $1.5 \times 10^4$ ,  $3.0 \times 10^4$ ,  $5.0 \times 10^4 \text{ kg}^{-1}$ . The  $0^\circ\text{C}$ ,  $-10^\circ\text{C}$ ,  
 246  $-20^\circ\text{C}$ ,  $-30^\circ\text{C}$  and  $-40^\circ\text{C}$  isotherms are shown by the dashed gray lines in (a)-(b).

247

248 280: The authors then note that the maximum amount of graupel in the mature stage is  
249 higher in P versus C, but don't explain why the results have changed.

250 280+ It is incorrect to claim that there are any appreciable differences in the dissipating  
251 stage, based on the numbers given.

252 **Response:**

253 Sorry for the ambiguity. The area we chose in the initial manuscript was too small,  
254 so the different stages could not be well matched in different cases. We have re-  
255 analyzed the microphysical processes after chosen a larger region (denoted in Figure  
256 4d, revised version), so that the microphysical processes can be analyzed entirely. In  
257 the larger analyzed region, domain-averaged properties and related analysis of graupel  
258 have been added in Table 3 and Part “4.2 Microphysical properties of multicell”  
259 (revised version, lines 362-382).

260

261 295: The short paragraph is a conclusion, rather than a result.

262 **Response:**

263 Thanks for the reminder. We have rephrased this paragraph. (Revised version,  
264 lines 383-386)

265

266 305: How is dipolar charge structure more consistent with previous observations. Please  
267 tell the reader the difference between dipolar and simple dipoles/tripoles.

268 **Response:**

269 Thanks for this suggestion. We have added related references and the description  
270 of charge structure. (Revised version, lines 409-418)

271

272 310: negative charge region in which simulation?

273 **Response:**

274 Thanks for this reminder. We have clarified this sentence as follows: **“The**  
275 **negative charge region in the upper level (12-15 km) for the P-case resulted from**  
276 **collisions of graupel particles with smaller ice crystals and snow particles (Fig.**  
277 **14d)”**. (Revised version, lines 422-424)

278

279 320: Why do graupel and hail particles charge negatively?

280 **Response:**

281 Thanks for this comment. We have added related reference to explain as follows:  
282 **“According to Saunders and Peck (1998) non-inductive charging curve, graupel**  
283 **charges negatively within regions of relatively weak updrafts ( $< 5 \text{ m s}^{-1}$ ) and lower**  
284 **liquid water content (LWC), forming a negative charge region at 4-8 km in the P-**  
285 **case.”** (Revised version, lines 436-439)

286

287 340: Very hard to understand the sentence structure.

288 **Response:**

289 Sorry for the ambiguity. This sentence has been modified in the revised version,  
290 lines 452-454.

291

292 350: More recent references needed.

293 **Response:**

294 Thanks for this suggestion. We have added recent references as follows:  
295 **“Previous studies showed that larger vertical velocities were driven by increased**  
296 **microphysical latent heating. (Wang et al., 2011; Mansell and Ziegler, 2013;**

297 **Altaratz et al., 2017; Fan et al., 2018; Li et al., 2019).**” (Revised version, lines 335-  
298 337)

299

300 355:

301 "Considering that both cases have rather high CCN concentration, there would not be  
302 much difference between them in condensation." So, then what makes them difference.  
303 (By the way, I am not sure I believe this; more information is needed comparing mass,  
304 not just concentrations -- but we're still left with the question of why?).

305 **Response:**

306 Thanks for this question. For clarity, we have used the temporal variation of the  
307 vertical profiles of peak latent heating (Figure 12, revised version) to make comparison  
308 of latent heat between both simulations during the whole duration of the thunderstorm.  
309 The latent heat shown in Figure 12 results from both condensation and freezing. For  
310 the condensation latent heat, we modified the related analysis in Part “**4.2**  
311 **Microphysical properties of multicell**”, for example:

312 Lines 323-329: “**Under polluted condition, more aerosols could be activated**  
313 **into cloud droplets and more water vapor condenses onto these droplets, leading**  
314 **to large cloud water content and small droplet size (Lynn et al., 2007; Wang et al.,**  
315 **2011; Zhao et al., 2015; Jiang et al., 2017). Thereby, relatively more latent heat of**  
316 **condensation released in the P-case where large cloud water content exists, which**  
317 **can be seen in the vertical distribution of peak latent heat (Figure 12).”**

318 For the frozen latent heat, the related analysis has been added as follows: “**the**  
319 **maximum of peak latent heat in the P-case occurs above 10 km at 09:30 UTC**  
320 **(Figure 12), indicating that more cloud droplets are lifted to the upper levels (< -**  
321 **40 °C) and converted into ice crystals at the beginning stage of the**  
322 **thunderstorm. ... The high value of latent heat existed in the higher levels (above**  
323 **10 km) reveals a large amount release of frozen latent heat. Previous studies also**

324 **found that elevated aerosol loading contributed to the increasing frozen latent heat**  
325 **(e.g., Khain et al., 2005; Lynn et al. 2007; Storer et al., 2010; Li et al.,**  
326 **2017).”(Revised version, lines 349-357)**

327

328 365: Section 4.5: Why is it a separate section and not integrated within the text?

329 370: "In the meanwhile" refers to when?

330 390: What simulation becomes much larger at 9:30 UTC?

331 **Response:**

332 Thanks for the comment. As mentioned before, we re-analyzed the microphysics  
333 along with further electrification and lightning activities of this thunderstorm, in the  
334 region denoted in Figure 4d. The re-analyzed results still suggest that under polluted  
335 condition lightning activity is significantly enhanced, while the delay of the first  
336 discharging in the C-case is not obvious. And we would delete this part in the revised  
337 version.

338

339 405: Please discuss what are the microphysical processes effected.

340 **Response:**

341 Thanks for the comment. The discussion of microphysical processes have been  
342 added. (Revised version, lines 471-480)

343

344 415: Is that heat of fusion rather than latent heat?

345 **Response:**

346 Thanks for this question. The latent heat shown in Figure 12 (revised version)  
347 results from both condensation and freezing.

348

349 425: The paragraph beginning with “Compared to C-case” has a contradiction.

350 Shouldn't ice and graupel grow more quickly due to coalescence? You just pointed out  
351 that "it was not noted."

352 **Response:**

353 Thanks for this comment. As mentioned before, we re-analyzed the microphysics  
354 along with further electrification and lightning activities of this thunderstorm, in the  
355 region denoted in Figure 4d. The re-analyzed results still suggest that under polluted  
356 condition lightning activity is significantly enhanced, while the delay of the first  
357 discharging in the C-case is not obvious. And we would delete related description in  
358 the revised version.

359

360 675: Figure 5: How are these vertical profiles calculated -- over what volume?

361 **Response:**

362 Thanks for this question. We have clarified as follows: "**Figure 10a-10h show the**  
363 **temporal variations of the vertical profiles for different hydrometeors. For each**  
364 **quantity, the mass mixing ratio and number concentration of hydrometeors are**  
365 **averaged horizontally over the analyzed region at a given altitude.**" (Revised  
366 version, lines 312-315).

367

368 685: Please better define "domain" in the figure caption of Figure 6.

369 **Response:**

370 Thanks for reminder. We have defined "domain" as "**the impacts of aerosol on**  
371 **lightning activity will only be evaluated in the southeastern Beijing area (39.4 N-**  
372 **40.6 N, 116.0 E-117.5 E, shown in Fig. 4d; here on, 'domain' for short)**" (revised  
373 version, lines 252-254) and denoted in the Figure 4d (revised version).

374

375 695/705: Figure 7 and 8: the word "main" is not clearly defined. Might differences also

376 be shown?

377 **Response:**

378 Thanks for reminder. We have clarified in Figure 14 and 15 as: “**simulated**  
379 **variables**” (revised version).

380

381 710: What is "the location shown in Fig. 2?"

382 **Response:**

383 Thanks for reminder. We have clarified in Figure 16 (revised version).



## References

- 385 Fan J, Rosenfeld D, Zhang Y, et al. Substantial convection and precipitation enhancements by  
ultrafine aerosol particles[J]. *Science*, 2018, 359(6374): 411-418.
- Gustafsson, N., Janjić, T., Schraff, C., Leuenberger, D., Weissmann, M., Reich, H., et al. (2018).  
Survey of data assimilation methods for convective scale numerical weather prediction at  
operational centres. *Quarterly Journal of the Royal Meteorological Society*, 144, 1218–1256.  
390 <https://doi.org/10.1002/qj.3179>
- Li Z, Wang Y, Guo J, et al. East asian study of tropospheric aerosols and their impact on regional  
clouds, precipitation, and climate (EAST-AIRCPC)[J]. *Journal of Geophysical Research:  
Atmospheres*, 2019, 124(23): 13026-13054.
- Sun, J., Xue, M., Wilson, J. W., Zawadzki, I., Ballard, S. P., Onvlee Hooimeyer, J., et al. (2014).  
395 Use of NWP for nowcasting convective precipitation: Recent progress and challenges. *Bulletin  
American Meteorological Society*, 95, 409–426. <https://doi.org/10.1175/BAMS-D-11-00263.1>
- Zrníc D S, Balakrishnan N, Ziegler C L, et al. Polarimetric signatures in the stratiform region of a  
mesoscale convective system[J]. *Journal of Applied Meteorology and Climatology*, 1993, 32(4): 678-  
693.

400
